# Supplementary material for: Hemolytic Activity in Relation to the Photosynthetic System in Chattonella marina and Chattonella ovata
Source: MDPI journal article supplement (doi:10.3390/md19060336), 2021-06-12

## Supplementary Material

### Hemolytic Activity in relation to the Photosynthetic System in

#### *Chattonella marina* and *Chattonella ovata*

Ni Wu<sup>1,2</sup>, Mengmeng Tong<sup>3\*</sup>, Siyu Gou<sup>1</sup>, Weiji Zeng<sup>1</sup>, Zhuoyun Xu<sup>3</sup>, Tianjiu Jiang<sup>1\*</sup>

<sup>1</sup> Research Center of Hydrobiology, Key Laboratory of Aquatic Eutrophication and Control of Harmful Algal Blooms of Guangdong Higher Education Institute, Jinan University, Guangzhou 510632, China

<sup>2</sup>South China Sea Institute of Planning and Environmental Research, State Oceanic Administration, Guangzhou 510300, China

<sup>3</sup> Ocean College, Zhejiang University, Zhoushan, 316021, China

\*Corresponding author: mengmengtong@zju.edu.cn, tjjiang@jnu.edu.cn

Supplementary Figure S1

Linear relationship between percent hemolytic activity and the reactive oxygen species (ROS) production of *Chattonella marina* (a,c,e) and *C. ovata* (b,d,f) under all treatments (a,b), light only (c,d) and iron only treatment (e,f).  $R^2$  = coefficient of determination of the fitted lines.

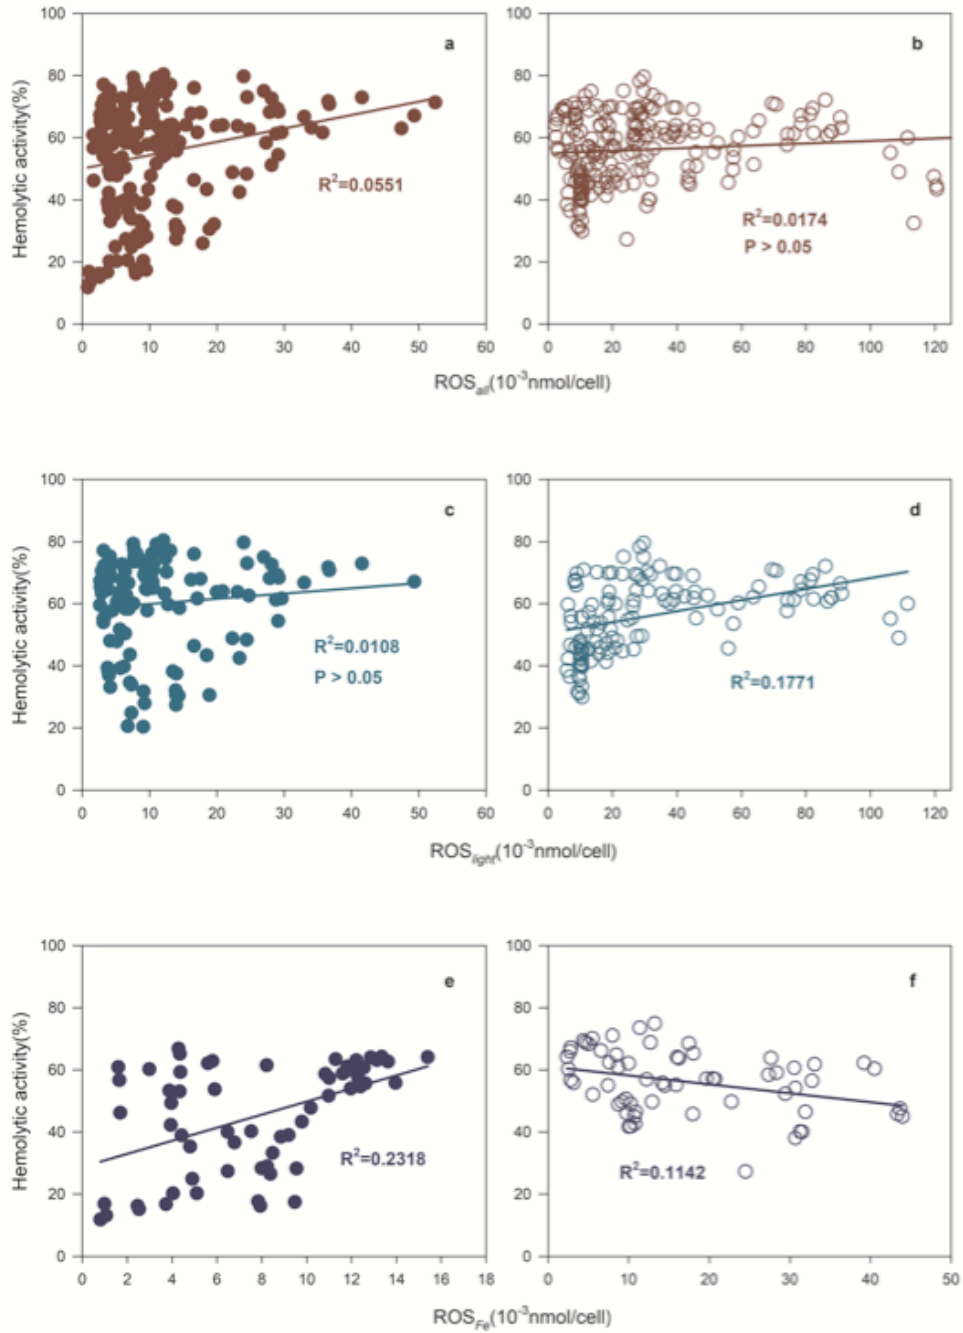

### Supplementary Figure S2

Linear relationship between hemolytic activity and ratio of photoprotective pigments to total pigments of *Chattonella marina* (a) and *C. ovata* (b).  $R^2$  = coefficient of determination of the fitted lines.

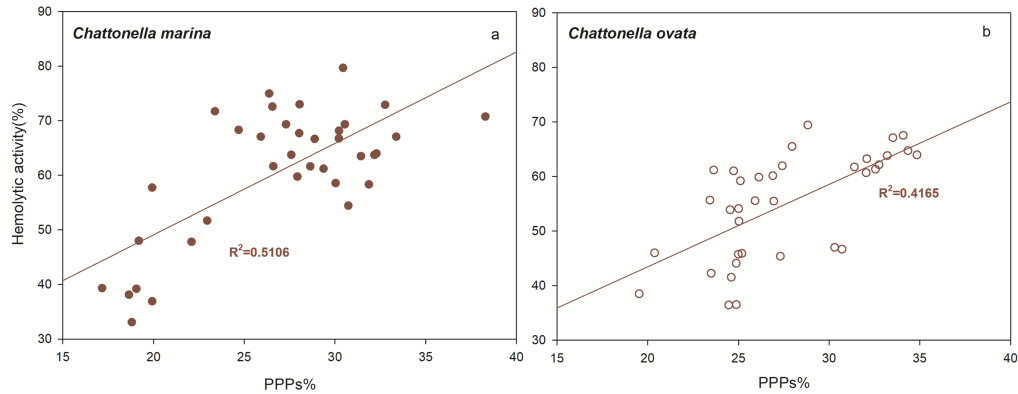

### Supplementary Figure S3

Linear relationship between hemolytic activity and Fv/Fm (blue), Yield (red), rETR (yellow) of *Chattonella marina* (a) and *C. ovata* (b) in varied light intensities, iron, light/dark cycle and photosynthetic blockers treatment.  $R^2$  = coefficient of determination of the fitted lines.

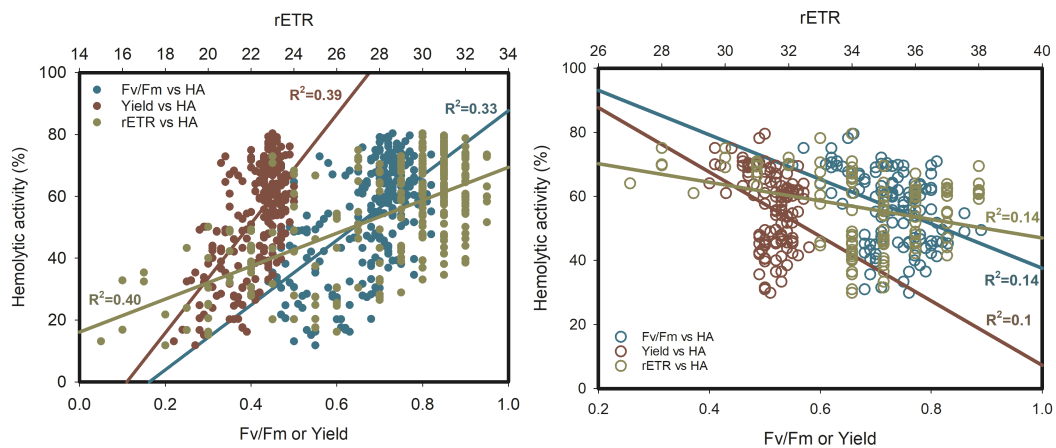

Supplement: s1 [file s1]
